# Supplementary material for: Discrimination of nerve gases mimics and other organophosphorous derivatives in gas phase using a colorimetric probe array
Source: Royal Society of Chemistry journal article supplement (doi:10.1039/c2cc34662a), 2012-01-01
Supplement: c2cc34662a.pdf [file c2cc34662a.pdf]

## Discrimination of nerve gases mimics and other organophosphorous derivatives in gas phase using a colorimetric probe array.

Katherine Chulvi,<sup>a,b</sup> Pablo Gaviña,<sup>a,b</sup> Ana M. Costero,<sup>a,b</sup> Salvador Gil,<sup>a,b</sup> Margarita Parra,<sup>a,b</sup> Raúl Gotor,<sup>a,b</sup> Santiago Royo,<sup>a,c,d</sup> Ramón Martínez-Máñez,<sup>a,c,d</sup> Felix Sancenón<sup>a,c,d</sup> and José-L. Vivancos<sup>a,d,e</sup>

<sup>a</sup> Centro de Reconocimiento Molecular y Desarrollo Tecnológico (IDM), Unidad Mixta Universidad Politécnica de Valencia-Universitat de Valencia

<sup>b</sup> Departamento de Química Orgánica, Universitat de Valencia, Dr. Moliner, 50, 46100 Burjassot (Valencia). Teléfono: 963543151. E-mail: ana.costero@uv.es.

<sup>c</sup> Departamento de Química, Universidad Politécnica de Valencia Camino de Vera s/n, 46022, Valencia, Spain.

<sup>d</sup> CIBER de Bioingeniería, Biomateriales y Nanomedicina (CIBER-BBN)

<sup>e</sup> Departamento de Proyectos de Ingeniería, Universitat Politécnica de Valencia, Camino de Vera s/n, 46021, Valencia, Spain.

### Supporting Information

#### Materials and General Procedures

All reagents and dyes **2-4**, **7**, **8**, **12**, **15** and **16** were commercially available and were used without further purification. Dyes **6**,<sup>[S1]</sup> **10**,<sup>[S2]</sup> **11**<sup>[S3]</sup> and **14**<sup>[S4]</sup> were synthesized according to previously published procedures.

<sup>1</sup>H and <sup>13</sup>C NMR spectra were recorded on a Bruker DPX300 (300 MHz) or a Bruker AV400 (400 MHz) NMR spectrometer. All measurements were carried out using the residual solvent peak as the internal reference. High-resolution mass spectra were recorded in the positive ion mode on a VG-AutoSpec.

TLC plates used as solid supports for the colorimetric arrays were commercially available silica gel on TLC Al foils (5 cm x 5 cm) without fluorescence indicator (Sigma-Aldrich). A HP Laser Jet M1005 MFP scanner was used to obtain pictures of the arrays.

#### Syntheses:

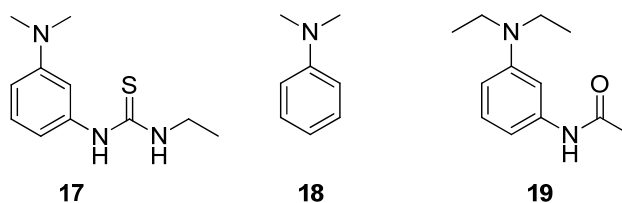

**Figure S1.** Dialkylanilines used in the diazonium coupling reactions.

**N-[3-(dimethylamino)phenyl]-N'-ethyl thiourea, 17.** A mixture of N,N-dimethyl-*m*-phenylenediamine (1.33 g, 9.8 mmol), ethyl isothiocyanate (0.86 mL, 9.8 mmol) and Et<sub>3</sub>N (1.36 mL, 9.8 mmol) in THF (10 mL) was refluxed for 13 h. Evaporation of the solvent and Et<sub>3</sub>N under reduced pressure led to a slightly yellow crystalline solid (1.91 g, 91%) which was used without further purification. <sup>1</sup>H-NMR (300 MHz, CDCl<sub>3</sub>): δ 7.95 (s, 1H, NH), 7.28 – 7.21 (m, 1H), 6.62 (dd, *J* = 8.4 and 2.5 Hz, 1H), 6.54 – 6.49 (m, 1H), 6.47 (t, *J* = 2.2 Hz, 1H), 6.20 (br.s, 1H, NH), 3.66 (m, 2H), 2.95 (s, 6H), 1.18 (t, *J* = 7.2 Hz, 3H). <sup>13</sup>C-NMR (75 MHz, CDCl<sub>3</sub>): δ 180.49, 152.17, 137.37, 130.92, 112.68, 111.34, 108.90, 40.69, 30.07, 14.75.

**Azo dyes.** Azo dyes **1**, **5**, **9** and **13** were synthesized by a coupling reaction between the diazonium ion obtained from 4-aminopyridine (or its 3-bromo- or 2,6-dichloro derivatives) and the corresponding dialkylaniline (Figure S1). A typical procedure is described for the synthesis of compound **5**.

**Compound 5.** 4-amino-2,6-dichloropyridine (166 mg, 1.0 mmol) was dissolved in a mixture of 85% phosphoric acid (1 mL) and 68% nitric acid (0.5 mL). The solution was cooled to 0 °C with an ice-bath and sodium nitrite (76 mg, 1.1 mmol) was added slowly. Then 4 g of crushed ice were added and the mixture was stirred for 1 h. The resulting yellow solution containing the diazonium salt was added dropwise over a mixture of N,N-dimethylaniline (**18**) (127 μL, 1.0 mmol), potassium acetate (2.1 g), sodium carbonate (1.8 g) and acetic acid (1.3 g) in water (30 mL) at 0 °C and the solution was stirred at this temperature for 12 h. The red-purple precipitate was collected by filtration, washed thoroughly with water and dried at 70 °C in an oven to yield **5** as a deep-red crystalline solid (235 mg, 79 %). <sup>1</sup>H NMR (300 MHz, CDCl<sub>3</sub>): δ 7.83 (d, *J* = 9.3 Hz, 1H), 7.54 (s, 1H), 6.68 (d, *J* = 9.4 Hz, 1H), 3.09 (s, 3H). <sup>13</sup>C NMR (75 MHz, CDCl<sub>3</sub>): δ 162.12, 154.57, 151.49, 143.64, 127.45, 115.95, 112.05, 40.79. HRMS (EI): *m/z* calcd. for C<sub>13</sub>H<sub>12</sub>N<sub>4</sub>Cl<sub>2</sub> ([M+H]<sup>+</sup>), 295.0517; found, 295.0518.

**Compound 1.** Deep purple solid (99 mg, 34 %). <sup>1</sup>H NMR (300 MHz, CDCl<sub>3</sub>): δ 8.55 (dd, *J* = 4.8, 1.4 Hz, 2H), 7.72 (d, *J* = 9.3 Hz, 1H), 7.47 (d, *J* = 6.2 Hz, 2H), 7.20 (s, *J* = 1.2 Hz, 1H), 6.45 (dd, *J* = 9.3, 2.8 Hz, 1H), 3.67 – 3.54 (m, 2H), 3.10 (s, 6H), 1.25 (t, *J* = 7.2 Hz, 3H). <sup>13</sup>C NMR (75 MHz, CDCl<sub>3</sub>): δ 180.26, 158.52, 154.77, 150.62, 138.91, 132.93, 116.57, 116.09, 108.49, 102.36, 45.44, 41.30, 14.49. HRMS (EI): *m/z* calcd. for C<sub>16</sub>H<sub>21</sub>N<sub>6</sub>S ([M+H]<sup>+</sup>), 329.1470; found, 329.1475.

**Compound 9.** Dark purple solid (1.4 g, 41 %). <sup>1</sup>H NMR (300 MHz, DMSO-*d*<sub>6</sub>): δ 10.61 (br. s, 1H, NH), 8.78 (d, *J* = 6.8 Hz, 2H), 8.13 (d, *J* = 7.0 Hz, 2H), 7.94 (d, *J* = 2.7 Hz, 1H), 7.84 (d, *J* = 9.7 Hz, 1H), 6.79 (dd, *J* = 9.7 and 2.8 Hz, 1H), 3.57 (q, *J* = 6.9 Hz, 4H), 2.26 (s, 3H), 1.22 (t, *J* = 7.0 Hz, 6H). <sup>13</sup>C NMR (75 MHz, DMSO-*d*<sub>6</sub>): δ 169.77, 162.03, 155.12, 143.40, 142.84, 133.27, 124.43, 117.29, 110.02, 100.73, 45.37, 25.05, 12.72. HRMS (EI): *m/z* calcd. for C<sub>17</sub>H<sub>21</sub>N<sub>5</sub>O ([M+H]<sup>+</sup>), 312.1824; found, 312.1826.

**Compound 13.** Dark purple solid (465 mg, 66%). <sup>1</sup>H NMR (300 MHz, DMSO-*d*<sub>6</sub>): δ 11.26 (br. s, 1H, NH), 8.99 (s, 1H), 8.59 (d, *J* = 6.1 Hz, 1H), 8.05 (d, *J* = 2.6 Hz, 1H),

7.94 (d,  $J = 6.0$  Hz, 1H), 7.78 (d,  $J = 9.6$  Hz, 1H), 6.83 (dd,  $J = 9.6$  and 2.7 Hz, 1H), 3.58 (q,  $J = 7.0$  Hz, 4H), 2.27 (s, 3H), 1.22 (t,  $J = 7.0$  Hz, 6H).  $^{13}\text{C}$  NMR (75 MHz, DMSO- $d_6$ ):  $\delta$  170.17, 157.55, 154.89, 148.14, 144.45, 140.65, 133.25, 129.84, 118.07, 112.09, 110.07, 100.46, 45.46, 25.58, 12.71. HRMS (EI):  $m/z$  calcd. for  $\text{C}_{17}\text{H}_{20}\text{N}_5\text{OBr}$  ( $[\text{M}]^+$ ), 390.0924; found, 390.0918.

### Selection of the dyes and detection experiments

A large number of commercially available dyes and some dyes reported by us were selected and tested in the presence of organophosphorous compounds shown in Scheme 2. In many cases no response was observed, the response was poor or not reproducible. From these studies finally the set of 16 dyes included in the manuscript was selected. A closer look to the dyes show that some of them are push-pull chromophores containing active reactive sites such as alcohol, amine, pyridine groups which are known to react with organophosphorous derivatives via nucleophilic attack to the phosphorous atom (see dyes 1, 2, 3, 5, 6, 7, 9, 10, 11, 13, and 14). Moreover other dyes used (i.e dyes 1, 4, 8, 9, 12, 13, 15 and 16) were also included in the array and displayed colour modulation most likely due to coordination or reaction with hydrolysis products of organophosphorous derivatives such as fluoride, cyanide, phosphate and protons.

In a typical sensing experiment, a 50  $\mu\text{L}$  drop of the corresponding organophosphorous derivative (or conc HCl) was deposited in the bottom of a 9 cm diameter Petri dish (110 mL volume). The colorimetric probe array was fixed in the top of the dish which was then closed. The temperature of the environment was kept at 25  $^\circ\text{C}$ . After 30 minutes the array was taken out of the Petri dish, scanned and compared with a control array not exposed to the tested vapour and kept at the same temperature.

### Vapour pressures and saturated vapour concentration of the studied analytes

|       | Vapor pressure<br>(mm Hg)                                                                   | Saturated vapour<br>concentration (ppm v/v) |
|-------|---------------------------------------------------------------------------------------------|---------------------------------------------|
| DCNP  | 0.158 <sup>(a)</sup> (25 $^\circ\text{C}$ )                                                 | 208                                         |
| DFP   | 0.579 <sup>(a)</sup> (20 $^\circ\text{C}$ )                                                 | 762                                         |
| DCP   | 0.1 <sup>(a)</sup> (25 $^\circ\text{C}$ )                                                   | 132                                         |
| EDCP  | 0.886 <sup>(b)</sup> (25 $^\circ\text{C}$ )<br>1.38 <sup>(c)</sup> (25 $^\circ\text{C}$ )   | 1166<br>1816                                |
| DPEP  | 0.000359 <sup>(d)</sup> (25 $^\circ\text{C}$ )                                              | 0.47                                        |
| DMTMP | 0.029 <sup>(b)</sup> (25 $^\circ\text{C}$ )<br>0.012 <sup>(c)</sup> (25 $^\circ\text{C}$ )  | 38.2<br>15.8                                |
| DCTP  | 0.5 <sup>(a)</sup> (25 $^\circ\text{C}$ )                                                   | 658                                         |
| DOPP  | 0.010 <sup>(b)</sup> (25 $^\circ\text{C}$ )<br>0.0096 <sup>(d)</sup> (25 $^\circ\text{C}$ ) | 13.2<br>12.6                                |

<sup>(a)</sup> Experimental value

<sup>(b)</sup> Predicted value (ACD/Labs)

<sup>(c)</sup> Predicted value (EPI Suite mean value from Antoine and Grain methods)

<sup>(d)</sup> Predicted value (EPI Suite modified Grain method)

### Interference studies with $\text{NO}_x$ and $\text{CO}_2$ .

Experiments with these two interferents were carried out following the procedure describes above. CO<sub>2</sub> was generated from 2 mg dry ice and NO<sub>x</sub> was obtained from the reaction between nitric and sulphuric acid in atmospheric air. Then a known volume of the gas at atmospheric pressure and 25°C was injected in the Petri dish containing the array.

### **Studies at different concentrations of DFP**

The experiments were carried out by flash evaporation of 1 μL of DFP in a round bottom flask of known volume (1.3, 2.5, 3.2, 3.6 and 5.7L) where the array had been previously placed. Normal air was let enter inside until atmospheric pressure. The closed system was then left at 25°C for 30 minutes. Concentrations of DFP of 108, 54, 44, 39, 24 ppm (v/v) were tested and colour changed in the array were analysed as explained above. A PLS prediction model for prediction of the DFP concentration was created with the RGB colour coordinates obtained from the chromogenic array (*vide infra*).

### **Statistical Multivariate Analysis**

All multivariate analyses were carried out with Matlab (Version 7.8.0.R2009a, MathWorks). We have included a third method of KNN classification where the "k" closest samples in a reference set vote on the class of an unknown sample based on distance to the reference samples. If no majority is found, the unknown is assigned the class of the closest sample. K-nearest neighbour classifier (KNN) models include the probabilities of each sample belonging to each possible class in the model classification probability field. The probability that a sample belongs to class 'A' is calculated as the fraction of nearest-neighbours which have that particular class. The number of components was used as default (i.e. the rank of analytes). Principal components analysis (PCA) was carried out with the Solo 6.2 software (eigenvector Research Incorporated, WA, USA). Autoscale preprocessing and singular value decomposition (SVD), i.e., an algorithm, were used to obtain a general solution to the problem of finding pseudoinverses. PLS is a multivariate projection method that models the relation between and array of dependent variables (Y) and another array of independent variables (X). The principle of the technique PLS is to find the components of the matrix of input (X) that describe, as much as possible, relevant variations in the input variables, and at the same time get the highest correlation with the objectives (Y), giving the minor weight to the variations that are irrelevant or relate to noise. PLS attempts to find factors (called Latent Variables) that maximize the amount of variation explained in X that is relevant for predicting Y. Preprocessing used is the Autoscale and the Cross validation: contiguous block is used to obtain Latent Variables. PLS prediction model of DFP was created with the colour coordinates obtained from the chromogenic arrays.

*Principal Component Analysis (PCA):*

Tables below correspond to PCA analysis for organophosphorous derivatives DFP, DCP, DCNP, EDCP, DPEP, DMTMP, DCTP, DOPP and HCl (see Figure 2 in the manuscript for a representation of the PCA graphic).

Eigenanalysis of the Correlation Matrix

|    | Eigenvalues | Variance Captured (%) | Cumulative Variance Captured (%) |
|----|-------------|-----------------------|----------------------------------|
| 1  | 2.48E+01    | 5.16E+01              | 51.64                            |
| 2  | 5.59E+00    | 1.17E+01              | 63.29                            |
| 3  | 4.42E+00    | 9.21E+00              | 72.50                            |
| 4  | 3.50E+00    | 7.29E+00              | 79.79                            |
| 5  | 2.54E+00    | 5.29E+00              | 85.08                            |
| 6  | 1.46E+00    | 3.05E+00              | 88.13                            |
| 7  | 1.21E+00    | 2.52E+00              | 90.65                            |
| 8  | 8.88E-01    | 1.85E+00              | 92.50                            |
| 9  | 7.27E-01    | 1.51E+00              | 94.02                            |
| 10 | 7.08E-01    | 1.48E+00              | 95.49                            |
| 11 | 4.70E-01    | 9.79E-01              | 96.47                            |
| 12 | 3.89E-01    | 8.11E-01              | 97.28                            |
| 13 | 3.34E-01    | 6.95E-01              | 97.98                            |
| 14 | 2.28E-01    | 4.76E-01              | 98.45                            |
| 15 | 1.66E-01    | 3.47E-01              | 98.80                            |
| 16 | 1.35E-01    | 2.82E-01              | 99.08                            |
| 17 | 1.11E-01    | 2.30E-01              | 99.31                            |
| 18 | 8.48E-02    | 1.77E-01              | 99.49                            |
| 19 | 6.41E-02    | 1.34E-01              | 99.62                            |
| 20 | 4.53E-02    | 9.44E-02              | 99.72                            |

| Sensor | Variable | PC 1 (51.64%) | PC 2 (11.65%) | PC 3 (9.21%) | PC 4 (7.29%) | Q Residuals (20.21%) | Hotelling T <sup>2</sup> (79.79%) |
|--------|----------|---------------|---------------|--------------|--------------|----------------------|-----------------------------------|
| 1      | R        | -7.19E-02     | 3.77E-02      | -1.29E-01    | 4.34E-02     | 20.3764552           | 1.17974242                        |
|        | G        | 7.20E-03      | 3.12E-01      | -5.80E-02    | -1.51E-01    | 9.35004246           | 5.80744056                        |
|        | B        | -5.25E-02     | 3.12E-01      | -1.02E-01    | 2.07E-01     | 4.95047543           | 7.21446676                        |
| 2      | R        | 7.58E-02      | 1.56E-01      | 2.13E-01     | -2.95E-02    | 13.4706056           | 3.58495926                        |
|        | G        | 1.85E-01      | 6.40E-02      | -2.66E-02    | -4.15E-02    | 3.15994683           | 1.91167583                        |
|        | B        | 1.93E-01      | 7.05E-02      | -6.67E-02    | 4.51E-03     | 0.64254918           | 2.20250784                        |
| 3      | R        | 1.79E-01      | 1.45E-01      | 9.94E-02     | 2.67E-02     | 1.12544878           | 2.98684358                        |
|        | G        | 4.98E-02      | 3.64E-01      | 1.38E-02     | 6.79E-02     | 4.65930074           | 6.58095835                        |
|        | B        | -1.83E-01     | 4.60E-03      | -1.52E-01    | 1.16E-01     | 0.63056944           | 3.29013168                        |
| 4      | R        | -1.97E-01     | 3.51E-02      | 3.55E-03     | -8.64E-02    | 0.20993836           | 2.22777206                        |
|        | G        | 1.69E-01      | -1.81E-01     | -2.59E-02    | -6.31E-02    | 2.4689863            | 3.09454651                        |
|        | B        | -1.73E-01     | -1.26E-01     | 5.05E-02     | -1.61E-01    | 1.6569702            | 3.49584844                        |
| 5      | R        | 6.15E-02      | -7.53E-02     | -8.10E-02    | -2.63E-01    | 15.6719409           | 4.01203021                        |

| Sensor | Variable | PC 1<br>(51.64%) | PC 2<br>(11.65%) | PC 3<br>(9.21%) | PC 4<br>(7.29%) | Q Residuals<br>(20.21%) | Hotelling<br>T <sup>2</sup><br>(79.79%) |
|--------|----------|------------------|------------------|-----------------|-----------------|-------------------------|-----------------------------------------|
| 6      | G        | 1.87E-01         | 1.02E-01         | -8.50E-02       | 3.67E-03        | 1.03491916              | 2.4806733                               |
|        | B        | -1.83E-01        | 1.49E-01         | -8.59E-03       | -4.68E-03       | 1.06821558              | 2.63272004                              |
|        | R        | 1.86E-01         | 4.81E-02         | 2.45E-03        | 1.69E-01        | 0.79482527              | 3.07120595                              |
| 7      | G        | 8.12E-02         | 1.50E-01         | 2.27E-01        | 2.10E-01        | 8.5149751               | 5.874542                                |
|        | B        | 1.81E-01         | 5.73E-02         | -3.85E-03       | 1.22E-01        | 2.95226567              | 2.40431628                              |
|        | R        | -6.62E-02        | 2.50E-01         | 2.62E-01        | -2.12E-01       | 2.15983742              | 8.46177804                              |
| 8      | G        | 1.84E-01         | 1.37E-01         | 4.99E-03        | 1.31E-02        | 1.35385052              | 2.48726626                              |
|        | B        | -7.12E-02        | 4.99E-02         | -2.37E-01       | 2.23E-01        | 11.3685472              | 5.34109936                              |
|        | R        | 1.39E-01         | 9.74E-02         | -1.95E-01       | 1.75E-02        | 7.73679965              | 3.1627263                               |
| 9      | G        | -9.72E-02        | -4.30E-02        | 2.19E-01        | -2.00E-01       | 10.4978488              | 4.6572014                               |
|        | B        | 1.81E-01         | 3.10E-02         | -1.17E-01       | -1.47E-01       | 1.29561833              | 3.24368291                              |
|        | R        | 7.27E-02         | -3.45E-02        | 1.58E-01        | 3.27E-01        | 9.81176708              | 6.5068654                               |
| 10     | G        | 1.88E-01         | 6.23E-02         | -2.87E-02       | 1.52E-01        | 0.49741727              | 2.969952                                |
|        | B        | -1.85E-01        | 5.74E-02         | -5.90E-02       | -9.73E-02       | 2.23599397              | 2.37000112                              |
|        | R        | 1.81E-01         | -3.88E-02        | 1.72E-01        | 3.76E-02        | 1.22293004              | 3.06475718                              |
| 11     | G        | -1.01E-01        | 1.03E-01         | -3.18E-01       | -5.35E-02       | 6.04316039              | 5.84997072                              |
|        | B        | 1.28E-01         | 2.02E-01         | 8.37E-03        | 5.54E-02        | 9.26321976              | 2.83876793                              |
|        | R        | 1.19E-01         | -5.54E-02        | -1.12E-01       | -4.36E-02       | 14.7954633              | 1.49023619                              |
| 12     | G        | 1.79E-01         | 1.48E-02         | 4.67E-02        | 1.96E-01        | 1.50155857              | 3.42998152                              |
|        | B        | -1.67E-01        | 1.97E-01         | -5.66E-02       | -2.47E-02       | 1.98539421              | 3.30633188                              |
|        | R        | 1.75E-01         | 9.86E-02         | 2.98E-02        | -9.56E-02       | 4.00615342              | 2.36102541                              |
| 13     | G        | 1.83E-01         | 1.01E-01         | -9.47E-02       | -5.11E-02       | 1.71821616              | 2.59113456                              |
|        | B        | 1.63E-01         | -8.56E-03        | -1.28E-01       | -1.84E-01       | 3.93855248              | 3.60227967                              |
|        | R        | -4.22E-02        | 9.62E-02         | -3.45E-02       | -1.27E-01       | 21.898378               | 1.33516181                              |
| 14     | G        | 1.88E-01         | 1.10E-01         | 1.27E-02        | -3.49E-02       | 1.2381234               | 2.30542785                              |
|        | B        | -1.34E-01        | 1.08E-01         | -2.03E-01       | 1.39E-01        | 6.27160748              | 4.23832101                              |
|        | R        | -1.78E-01        | 1.44E-01         | 5.36E-02        | 1.01E-01        | 1.23858746              | 3.08772863                              |
| 15     | G        | -1.40E-01        | 6.84E-02         | 2.03E-01        | 2.00E-01        | 4.28071332              | 4.9522232                               |
|        | B        | -1.34E-01        | 1.15E-01         | 2.09E-01        | 2.48E-01        | 1.94395194              | 6.39176914                              |
|        | R        | -5.32E-02        | 2.35E-01         | -2.77E-01       | -2.54E-02       | 7.27162994              | 6.36335346                              |
| 16     | G        | -4.50E-02        | 2.26E-01         | 2.54E-01        | -2.83E-01       | 2.52001489              | 9.30968541                              |
|        | B        | -3.88E-02        | 2.89E-01         | 1.34E-01        | -2.55E-01       | 4.86505742              | 7.90799827                              |
|        | R        | 1.37E-01         | -7.12E-02        | -8.90E-03       | -1.03E-01       | 12.2481147              | 1.62243957                              |
| 16     | G        | 1.40E-01         | -1.10E-01        | 2.71E-01        | -1.10E-02       | 3.08460021              | 4.96067574                              |
|        | B        | 1.75E-01         | 4.44E-02         | -1.58E-01       | -1.48E-01       | 1.15208282              | 3.73777701                              |

Tables below correspond to PCA analysis for organophosphorous derivatives DFP, DCP, DCNP, EDCP, DPEP, DMTMP, DCTP, DOPP, HCl and interferents (CO<sub>2</sub> and NO<sub>x</sub>). Blank samples (without the presence of organophosphorous derivatives or interferents) (three replicates at 25 °C), blank samples at different temperatures (0° and 55°C) and a blank sample in saturated H<sub>2</sub>O (25°C) have also been included (see Figure S2 below for a representation of the PCA graphic).

Eigenanalysis of the Correlation Matrix

|    | Eigenvalues | Variance Captured (%) | Cumulative Variance Captured (%) |
|----|-------------|-----------------------|----------------------------------|
| 1  | 2.17E+01    | 45.26                 | 45.26                            |
| 2  | 5.71E+00    | 11.90                 | 57.16                            |
| 3  | 4.01E+00    | 8.36                  | 65.52                            |
| 4  | 3.26E+00    | 6.80                  | 72.32                            |
| 5  | 2.34E+00    | 4.87                  | 77.19                            |
| 6  | 1.91E+00    | 3.99                  | 81.18                            |
| 7  | 1.43E+00    | 2.99                  | 84.17                            |
| 8  | 1.21E+00    | 2.53                  | 86.70                            |
| 9  | 1.01E+00    | 2.10                  | 88.80                            |
| 10 | 8.79E-01    | 1.83                  | 90.64                            |
| 11 | 7.09E-01    | 1.48                  | 92.11                            |
| 12 | 6.59E-01    | 1.37                  | 93.49                            |
| 13 | 6.22E-01    | 1.30                  | 94.78                            |
| 14 | 4.59E-01    | 0.96                  | 95.74                            |
| 15 | 3.60E-01    | 0.75                  | 96.49                            |
| 16 | 2.66E-01    | 0.55                  | 97.05                            |
| 17 | 2.27E-01    | 0.47                  | 97.52                            |
| 18 | 2.02E-01    | 0.42                  | 97.94                            |
| 19 | 1.85E-01    | 0.38                  | 98.32                            |
| 20 | 1.39E-01    | 0.29                  | 98.61                            |

| Sensor | Variable | PC 1<br>(45.26%) | PC 2<br>(11.90%) | PC 3<br>(8.36%) | PC 4<br>(6.80%) | Q Residuals<br>(27.68%) | Hotelling T <sup>2</sup><br>(72.32%) |
|--------|----------|------------------|------------------|-----------------|-----------------|-------------------------|--------------------------------------|
| 1      | R        | -7.60E-02        | -4.01E-02        | 2.29E-02        | -1.25E-01       | 32.4857                 | 1.1089                               |
|        | G        | 1.58E-02         | -6.68E-02        | 3.31E-01        | 4.71E-02        | 20.9237                 | 5.4644                               |
|        | B        | -6.63E-02        | 5.30E-02         | 3.09E-01        | -1.60E-01       | 16.9035                 | 6.0191                               |
| 2      | R        | 1.28E-01         | -1.73E-01        | 1.03E-01        | 1.66E-01        | 13.6772                 | 3.9712                               |
|        | G        | 1.84E-01         | -1.74E-01        | 5.37E-02        | 5.31E-02        | 2.7996                  | 3.2815                               |
|        | B        | 1.97E-01         | -1.31E-01        | 5.83E-02        | 8.83E-03        | 1.6755                  | 2.7996                               |
| 3      | R        | 1.73E-01         | 1.64E-01         | 1.79E-01        | 3.99E-03        | 2.7787                  | 4.1777                               |
|        | G        | 1.97E-02         | 1.37E-01         | 4.06E-01        | -2.70E-02       | 8.8175                  | 8.6835                               |
|        | B        | -1.92E-01        | -5.04E-02        | -6.19E-03       | -1.82E-01       | 2.9899                  | 3.4182                               |
| 4      | R        | -2.09E-01        | -5.11E-02        | 4.51E-02        | 2.30E-02        | 1.0044                  | 2.2984                               |
|        | G        | 1.72E-01         | 6.83E-02         | -2.03E-01       | 9.93E-03        | 6.5071                  | 3.5599                               |
|        | B        | -1.94E-01        | 1.39E-02         | -9.66E-02       | 2.87E-02        | 5.6144                  | 2.2566                               |
| 5      | R        | 9.51E-02         | -1.58E-01        | -5.17E-02       | 5.00E-02        | 25.6544                 | 1.8479                               |
|        | G        | 1.97E-01         | 4.65E-03         | 9.99E-02        | -6.70E-02       | 4.1322                  | 2.5022                               |
|        | B        | -1.83E-01        | -9.07E-02        | 1.78E-01        | -2.53E-02       | 3.9095                  | 3.4768                               |
| 6      | R        | 8.95E-02         | 3.28E-01         | 3.04E-02        | -1.73E-01       | 4.3756                  | 6.8866                               |
|        | G        | -1.66E-02        | 3.38E-01         | 1.63E-01        | -1.17E-01       | 7.6371                  | 7.2685                               |
|        | B        | 9.85E-02         | 3.15E-01         | 4.66E-02        | -1.64E-01       | 5.0032                  | 6.4970                               |
| 7      | R        | -1.03E-01        | 9.27E-02         | 2.95E-01        | 2.28E-01        | 8.1824                  | 7.4162                               |

| Sensor | Variable | PC 1<br>(45.26%) | PC 2<br>(11.90%) | PC 3<br>(8.36%) | PC 4<br>(6.80%) | Q Residuals<br>(27.68%) | Hotelling<br>T <sup>2</sup><br>(72.32%) |
|--------|----------|------------------|------------------|-----------------|-----------------|-------------------------|-----------------------------------------|
| 8      | G        | 1.95E-01         | 4.10E-02         | 1.11E-01        | 6.30E-02        | 4.1136                  | 2.6327                                  |
|        | B        | -6.77E-02        | -5.95E-02        | 1.93E-03        | -8.44E-02       | 34.2716                 | 0.7175                                  |
|        | R        | 1.48E-01         | -2.65E-02        | 4.38E-02        | -5.72E-02       | 20.0295                 | 1.3085                                  |
| 9      | G        | -1.01E-01        | 3.84E-02         | -4.79E-02       | 3.13E-01        | 17.6728                 | 5.2644                                  |
|        | B        | 1.89E-01         | -5.78E-02        | 3.13E-02        | -2.78E-02       | 7.8662                  | 1.9221                                  |
|        | R        | 4.02E-02         | 2.54E-01         | -8.71E-02       | -1.71E-02       | 22.6201                 | 3.4755                                  |
| 10     | G        | 1.98E-01         | 9.75E-02         | 3.01E-02        | -3.15E-02       | 3.4625                  | 2.3794                                  |
|        | B        | -1.93E-01        | -1.12E-01        | 8.83E-02        | -5.91E-02       | 3.1516                  | 2.8687                                  |
|        | R        | 1.53E-01         | 2.22E-01         | -6.73E-03       | -2.05E-02       | 8.4809                  | 3.4252                                  |
| 11     | G        | -8.18E-02        | -1.52E-01        | 1.38E-01        | -3.34E-01       | 11.2861                 | 7.5431                                  |
|        | B        | 1.31E-01         | 6.52E-02         | 2.24E-01        | -6.80E-02       | 15.3993                 | 3.5888                                  |
|        | R        | 1.11E-01         | -7.10E-03        | -7.22E-02       | 3.60E-03        | 28.4825                 | 0.8248                                  |
| 12     | G        | 1.76E-01         | 1.73E-01         | -3.55E-02       | 1.61E-02        | 5.8599                  | 2.9468                                  |
|        | B        | -1.86E-01        | 2.78E-02         | 1.91E-01        | -1.29E-01       | 1.8353                  | 4.1597                                  |
|        | R        | 1.78E-01         | -5.67E-02        | 6.26E-02        | 1.56E-01        | 7.8579                  | 2.9736                                  |
| 13     | G        | 1.92E-01         | -1.29E-01        | 6.31E-02        | 5.02E-02        | 3.1560                  | 2.8181                                  |
|        | B        | 1.80E-01         | -1.20E-01        | 2.91E-02        | -2.55E-02       | 8.2865                  | 2.2728                                  |
|        | R        | -2.82E-02        | -6.35E-02        | 2.20E-02        | 1.91E-01        | 33.5373                 | 1.9683                                  |
| 14     | G        | 1.92E-01         | 2.00E-02         | 1.18E-01        | 6.27E-02        | 5.0233                  | 2.5926                                  |
|        | B        | -7.53E-02        | -2.02E-01        | 1.38E-01        | -2.66E-01       | 13.4367                 | 6.4139                                  |
|        | R        | -1.75E-01        | 8.71E-02         | 7.76E-02        | 1.37E-01        | 8.3420                  | 2.9523                                  |
| 15     | G        | -1.42E-01        | 1.97E-01         | -1.58E-02       | 1.89E-01        | 9.0247                  | 4.4563                                  |
|        | B        | -1.54E-01        | 2.12E-01         | 3.45E-02        | 1.40E-01        | 6.2576                  | 4.2148                                  |
|        | R        | 8.76E-02         | -3.16E-01        | 1.09E-01        | -1.46E-03       | 8.5636                  | 5.6227                                  |
| 16     | G        | -6.35E-02        | 5.06E-02         | 2.54E-01        | 3.43E-01        | 10.2450                 | 8.8537                                  |
|        | B        | -2.82E-04        | -1.01E-01        | 2.77E-01        | 2.39E-01        | 17.8934                 | 6.7702                                  |
|        | R        | 1.41E-01         | 3.30E-02         | -7.24E-04       | -1.42E-01       | 19.7223                 | 1.9447                                  |
| 16     | G        | 1.11E-01         | 1.05E-02         | -1.10E-01       | 2.97E-01        | 15.7105                 | 5.3111                                  |
|        | B        | 1.90E-01         | -7.41E-02        | 8.07E-02        | -1.12E-01       | 4.7648                  | 2.8437                                  |

Figure S2 shows the resulting PCA for the 9 sampling organo- phosphate and phosphonate derivatives (three replicates), interferents (CO<sub>2</sub> and NO<sub>x</sub>, three replicates) and blank samples (three blank samples at 25 °C, two blank samples at different temperatures (0° and 55°C) and one blank sample in saturated H<sub>2</sub>O at 25°C) using all dyes (16 x 3 coordinates/dye). Here the PCs score plot uses two PCs (PC1 and PC2) representing the 57.16% of variance. A clustering of the data was found. A clear discrimination of the nerve agent simulants DCNP, DFP and DCP was observed and this was not confused with the presence of acidic vapours (HCl). Moreover other tested products were gathered in larger clusters which allowed to classify the samples in organo-phosphates (EDCP and DCTP) and phosphonates (DOPP, DMTMP and DPEP). The different blank samples and CO<sub>2</sub> and NO<sub>x</sub> also clustered in the same space. This last result indicated that no interference from CO<sub>2</sub> and NO<sub>x</sub> or the use of different temperatures or saturated H<sub>2</sub>O was observed.



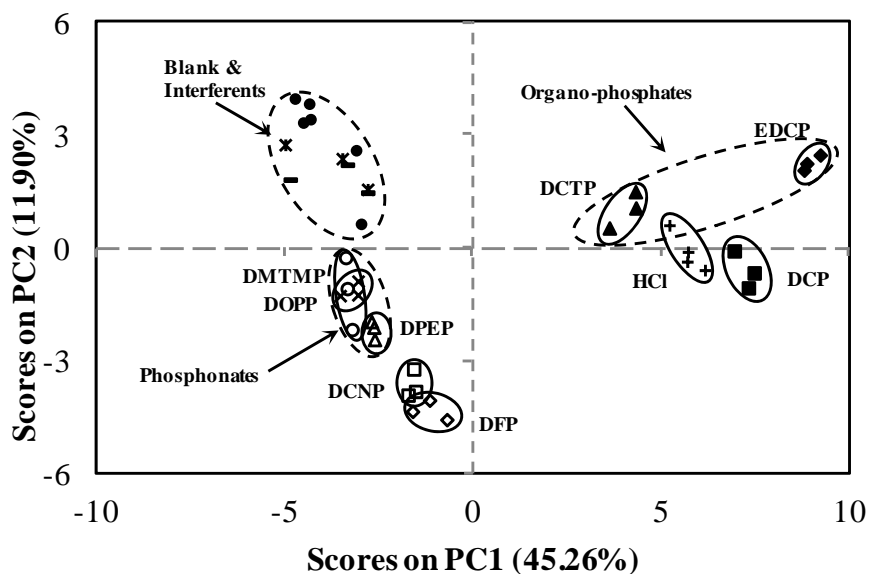

**Figure S2.** PCA score plot of PC1 and PC2 for some products in Scheme 2 and HCl (3 each) and the trial clustering, blank samples (three blank samples at 25 °C, two blank samples at 0° and 55°C and one blank sample in saturated H<sub>2</sub>O at 25°C) and interferents as CO<sub>2</sub> and NO<sub>x</sub> have also been included.

### *Hierarchical Clustering Analysis (HCA):*

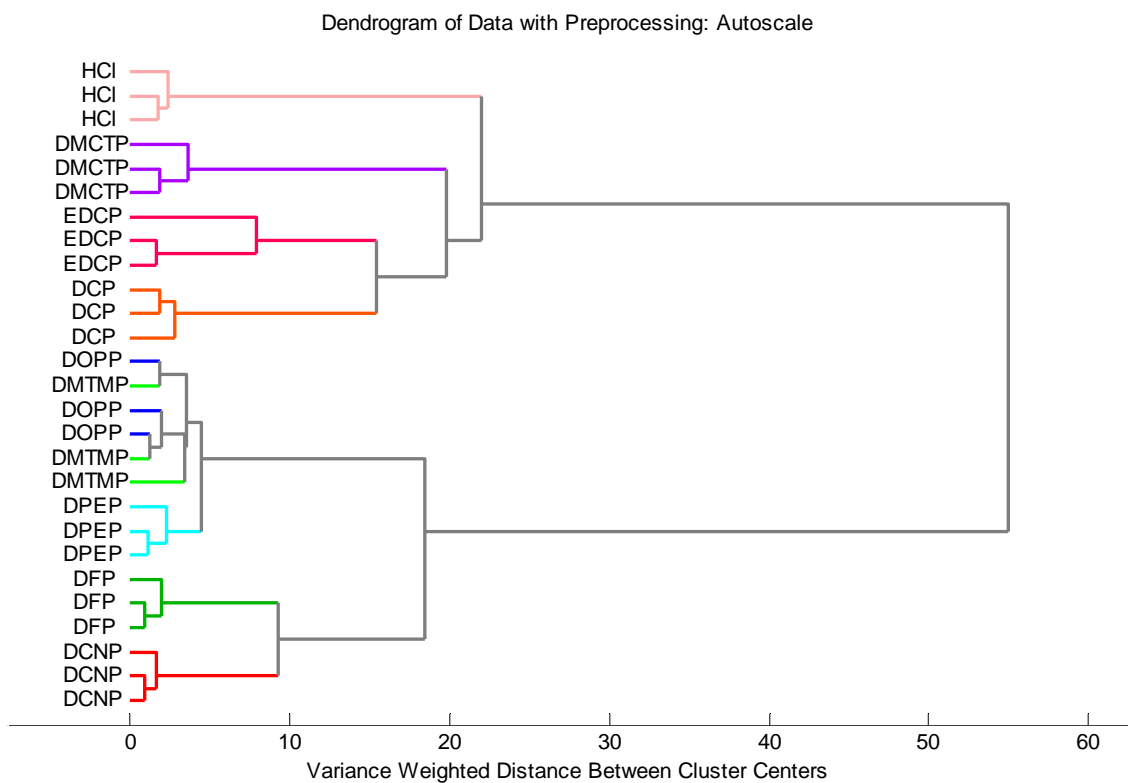

**Figure S3.** Dendrogram for 9 sampling organo- phosphate and phosphonate derivatives showing Euclidean Distance with Ward Linkage, in this case clustering is done on the seven PCA scores instead of the original X-variables.

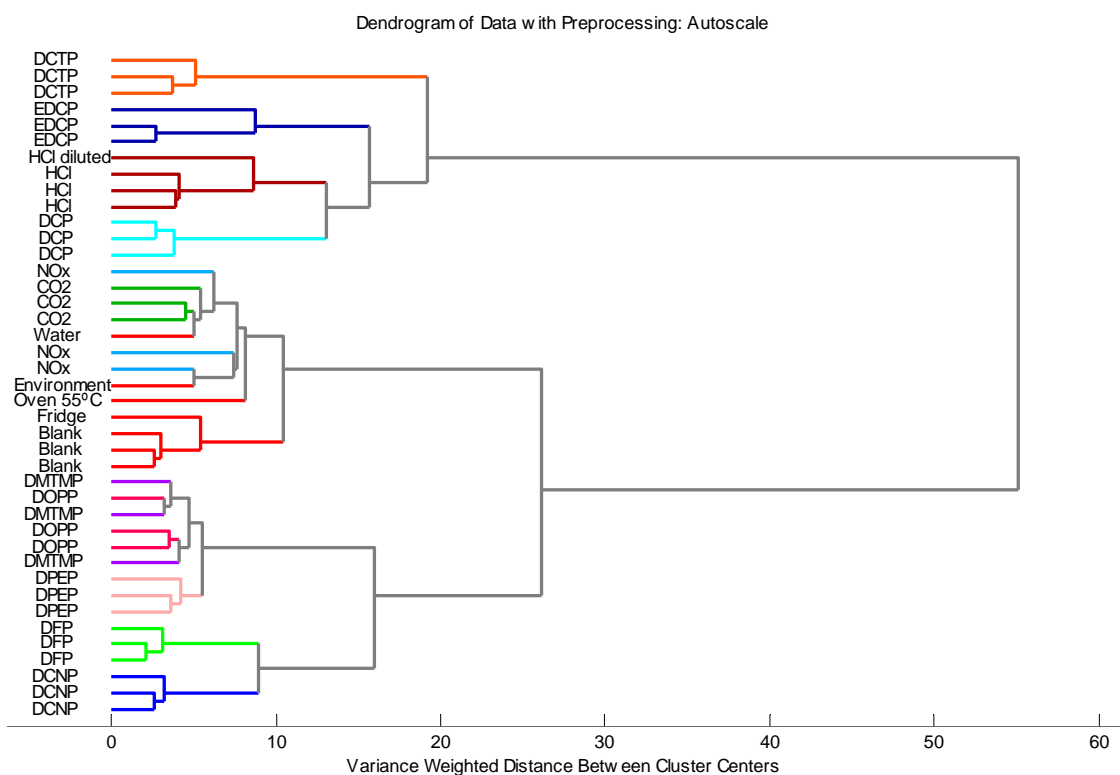

**Figure S4.** Dendrogram for 9 sampling organo- phosphate and phosphonate derivatives, blank samples and interferences as CO<sub>2</sub> and NO<sub>x</sub> showing Euclidean Distance with Ward Linkage.

### *K*-nearest neighbour classifier (KNN) model

Confusion Matrix:

| Class:           | TP     | FP     | TN     | FN     |
|------------------|--------|--------|--------|--------|
| Blank            | 0.5714 | 0.0294 | 0.9706 | 0.4286 |
| DCNP             | 1.0000 | 0.0000 | 1.0000 | 0.0000 |
| DCP              | 1.0000 | 0.0263 | 0.9737 | 0.0000 |
| DFP              | 1.0000 | 0.0000 | 1.0000 | 0.0000 |
| HCl              | 1.0000 | 0.0000 | 1.0000 | 0.0000 |
| Interferents     | 0.8333 | 0.0857 | 0.9143 | 0.1667 |
| OrganoPhosphates | 0.8333 | 0.0000 | 1.0000 | 0.1667 |
| Phosphonates     | 1.0000 | 0.0000 | 1.0000 | 0.0000 |

TP: proportion of positive cases that were correctly identified

FP: proportion of negatives cases that were incorrectly classified as positive

TN: proportion of negatives cases that were classified correctly

FN: proportion of positive cases that were incorrectly classified as negative

Confusion Table:

| Actual Class                                           | Blank | DCNP | DCP  | DFP           | HCl  | Interferents<br>(CO <sub>2</sub> and<br>NO <sub>x</sub> ) | Organo-<br>phosphates | Phosphonates            |
|--------------------------------------------------------|-------|------|------|---------------|------|-----------------------------------------------------------|-----------------------|-------------------------|
| Predicted as                                           |       |      |      |               |      |                                                           |                       |                         |
| Blank                                                  | 4     | 0    | 0    | 0             | 0    | 1                                                         | 0                     | 0                       |
| DCNP                                                   | 0     | 3    | 0    | 0             | 0    | 0                                                         | 0                     | 0                       |
| DCP                                                    | 0     | 0    | 3    | 0             | 0    | 0                                                         | 1                     | 0                       |
| DFP                                                    | 0     | 0    | 0    | 3             | 0    | 0                                                         | 0                     | 0                       |
| HCl                                                    | 0     | 0    | 0    | 0             | 4    | 0                                                         | 0                     | 0                       |
| Interferents<br>(CO <sub>2</sub> and NO <sub>x</sub> ) | 3     | 0    | 0    | 0             | 0    | 5                                                         | 0                     | 0                       |
| Organo-<br>phosphates                                  | 0     | 0    | 0    | 0             | 0    | 0                                                         | 5                     | 0                       |
| Phosphonates                                           | 0     | 0    | 0    | 0             | 0    | 0                                                         | 0                     | 9                       |
| Total N                                                | 7     | 3    | 3    | 3             | 4    | 6                                                         | 6                     | 9                       |
| Ncorrect                                               | 4     | 3    | 3    | 3             | 4    | 5                                                         | 5                     | 9                       |
| Proportion                                             | 57%   | 100% | 100% | 100%          | 100% | 83%                                                       | 83%                   | 100%                    |
|                                                        | N= 41 |      |      | Ncorrect = 36 |      |                                                           |                       | Proportion Correct= 88% |

*Partial Least Square (PLS) studies:*

A PLS model for prediction of the DFP concentration was created with the RGB colour coordinates obtained from the chromogenic array (vide infra). Concentrations of DFP of 108, 54, 44, 39 and 24 ppm (v/v) were tested. Figure S5 shows the PLS graph in which the measured vs. the predicted values of DFP concentrations ppm (v/v) were plotted. Hence the measured values represent the real DFP concentration, while the predicted values are calculated according to the PLS algorithm using the RGB data. Both the measured and predicted values were plotted together to evaluate the accuracy and precision of the created prediction model. Ideally, the predicted values should lie along the diagonal line, indicating in this case that the predicted and actual values are the same. The PLS prediction model for DFP concentrations shows a good agreement between the measured and predicted values suggesting that the array could display sensing of this hazard at concentrations of some few ppm.

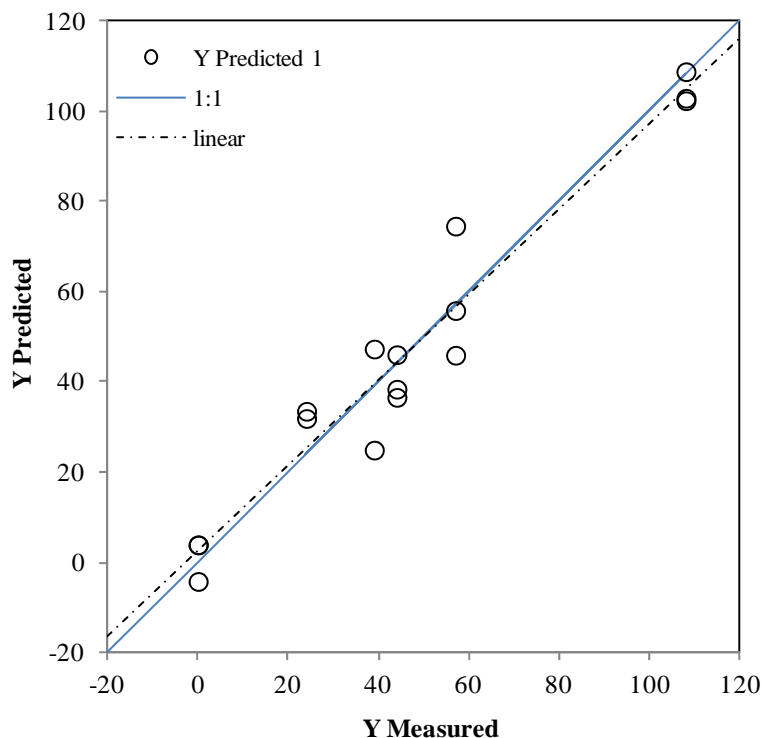

**Figure S5.** Experimental versus predicted values of DFP concentrations (ppm v/v) by using the PLS statistical model (dashed lines). The solid line represents the ideal behaviour.

#### References:

- S1: S. Royo, R. Gotor, A. M. Costero, M. Parra, S. Gil, R. Martínez-Máñez, F. Sancenón, *New J. Chem.* **2012**, *36*, 1485.
- S2: R. Gotor, A. M. Costero, S. Gil, M. Parra, R. Martínez-Máñez, F. Sancenón, *Chem. Eur. J.*, **2011**, *17*, 11994.
- S3: H. Li, C.-H. Huang, Y.-F. Zhou, X.-S. Zhao, X.-H. Xia, T.-K. Li, J. Bai, *J. Mater. Chem.* **1995**, *5*, 1871.
- S4: A. M. Costero, M. Parra, S. Gil, R. Gotor, R. Martínez-Máñez, F. Sancenón, S. Royo, *Eur. J. Org. Chem.* **2012** in press (DOI: 10.1002/ejoc.201200570).
